# Supplementary material for: Exploration of the Effects of Cadmium Stress on Photosynthesis in Oenanthe javanica (Blume) DC
Source: MDPI journal article supplement (doi:10.3390/toxics12050307), 2024-04-23
Supplement: s1 [file s1]

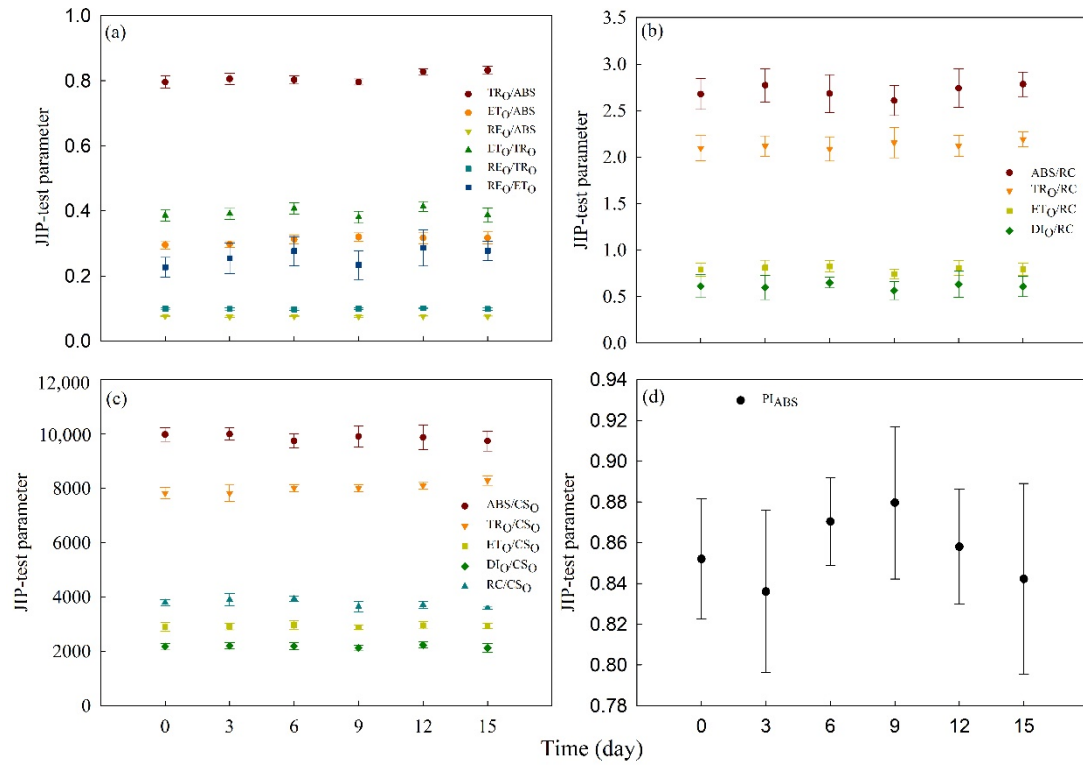

**Figure S1.** Relative changes in JIP-test parameters after 15 d of Cd<sub>0</sub> treatment. (a) TR<sub>0</sub>/ABS, ET<sub>0</sub>/ABS, RE<sub>0</sub>/ABS, ET<sub>0</sub>/TR<sub>0</sub>, RE<sub>0</sub>/TR<sub>0</sub> and RE<sub>0</sub>/ET<sub>0</sub>; (b) ABS/RC, TR<sub>0</sub>/RC, ET<sub>0</sub>/RC, DI<sub>0</sub>/RC; (c) ABS/CS<sub>0</sub>, TR<sub>0</sub>/CS<sub>0</sub>, ET<sub>0</sub>/CS<sub>0</sub>, DI<sub>0</sub>/CS<sub>0</sub>, RC/CS<sub>0</sub>; (d) PI<sub>ABS</sub>. The average of five replicates is used as the value, and the error was determined based on this value ( $n = 5$ ).
