# Supplementary material for: Exploration of the Effects of Cadmium Stress on Photosynthesis in Oenanthe javanica (Blume) DC
Source: MDPI journal article supplement (doi:10.3390/toxics12050307), 2024-04-23
Supplement: s1 [file s1]

**Table S3.** DF parameters of the Cd<sub>100</sub> group on the 0th, 3rd, 6th, 9th, 12th and 15th days of treatment.

|      | I <sub>1</sub>   | I <sub>2</sub> | I <sub>2</sub> /I <sub>1</sub> |
|------|------------------|----------------|--------------------------------|
| 0 d  | 328.78 ± 12.79 a | 56.96 ± 3.43 a | 0.174 ± 0.009 a                |
| 3 d  | 276.94 ± 8.35 b  | 53.73 ± 3.24 b | 0.196 ± 0.006 b                |
| 6 d  | 167.96 ± 6.28 c  | 42.40 ± 2.57 c | 0.254 ± 0.015 c                |
| 9 d  | 96.29 ± 5.64 d   | 33.53 ± 2.62 d | 0.347 ± 0.018 d                |
| 12 d | 52.34 ± 2.17 e   | 28.06 ± 1.68 e | 0.537 ± 0.017 e                |
| 15 d | 36.35 ± 2.35 f   | 22.82 ± 2.49 f | 0.805 ± 0.033 f                |

Value are means ± SD (*n* = 5). Duncan's multiple range test is used for multiple comparisons. Lowercase letters within the same column indicate significant differences at the *P* < 0.05 level.
