# Supplementary material for: Exploration of the Effects of Cadmium Stress on Photosynthesis in Oenanthe javanica (Blume) DC
Source: MDPI journal article supplement (doi:10.3390/toxics12050307), 2024-04-23
Supplement: s1 [file s1]

**Table S2.** Physiological parameters of the Cd<sub>100</sub> group on the 0th, 3rd, 6th, 9th, 12th and 15th days of treatment.

|      | TR <sub>O</sub> /ABS | ET <sub>O</sub> /ABS | RE <sub>O</sub> /ABS | ET <sub>O</sub> /TR <sub>O</sub> | RE <sub>O</sub> /TR <sub>O</sub> | RE <sub>O</sub> /ET <sub>O</sub> | ABS/CS <sub>O</sub>              | TR <sub>O</sub> /CS <sub>O</sub> |
|------|----------------------|----------------------|----------------------|----------------------------------|----------------------------------|----------------------------------|----------------------------------|----------------------------------|
| 0 d  | 0.786 ± 0.005 a      | 0.294 ± 0.014 a      | 0.071 ± 0.002 a      | 0.374 ± 0.016 a                  | 0.091 ± 0.003 ab                 | 0.243 ± 0.008 b                  | 9989.833.000 ± 588.214 a         | 7848.839 ± 444.876 a             |
| 3 d  | 0.757 ± 0.039 ab     | 0.256 ± 0.067 ab     | 0.055 ± 0.022 ab     | 0.334 ± 0.072 ab                 | 0.071 ± 0.026 b                  | 0.207 ± 0.037 bc                 | 9668.000 ± 787.370 a             | 7348.039 ± 970.720 bc            |
| 6 d  | 0.689 ± 0.006 bc     | 0.213 ± 0.004 bc     | 0.068 ± 0.003 a      | 0.310 ± 0.007 abc                | 0.099 ± 0.006 a                  | 0.318 ± 0.015 ab                 | 10674.000 ± 151.286 a            | 7349.509 ± 150.819 bc            |
| 9 d  | 0.648 ± 0.029 cd     | 0.175 ± 0.026 cd     | 0.046 ± 0.002 b      | 0.269 ± 0.029 bcd                | 0.072 ± 0.005 ab                 | 0.271 ± 0.051 b                  | 10370.330 ± 288.185 a            | 6681.013 ± 305.626 c             |
| 12 d | 0.617 ± 0.036 d      | 0.141 ± 0.042 d      | 0.054 ± 0.006 ab     | 0.227 ± 0.056 d                  | 0.087 ± 0.006 ab                 | 0.403 ± 0.111 a                  | 8174.500 ± 1206.701 b            | 5052.563 ± 906.451 d             |
| 15 d | 0.240 ± 0.084 e      | 0.064 ± 0.034 e      | 0.004 ± 0.004 c      | 0.253 ± 0.060 cd                 | 0.025 ± 0.028 c                  | 0.111 ± 0.144 c                  | 4296.667 ± 161.203 c             | 1033.257 ± 361.081 e             |
|      | ABS/RC               | TR <sub>O</sub> /RC  | ET <sub>O</sub> /RC  | DI <sub>O</sub> /RC              | PI <sub>ABS</sub>                | ET <sub>O</sub> /CS <sub>O</sub> | DI <sub>O</sub> /CS <sub>O</sub> | RC/CS <sub>O</sub>               |
| 0 d  | 2.664 ± 0.151 c      | 2.093 ± 0.110 e      | 0.783 ± 0.034 a      | 0.571 ± 0.043 e                  | 0.831 ± 0.116 a                  | 2938.402 ± 221.566 a             | 2140.994 ± 153.179 c             | 3759.032 ± 296.916 a             |
| 3 d  | 3.315 ± 0.669 bc     | 2.512 ± 0.374 d      | 0.818 ± 0.057 a      | 0.833 ± 0.295 de                 | 0.586 ± 0.055 b                  | 2514.700 ± 848.695 ab            | 2319.961 ± 197.298 c             | 3027.672 ± 830.412 ab            |
| 6 d  | 4.248 ± 0.132 bc     | 2.924 ± 0.065 c      | 0.905 ± 0.032 a      | 1.324 ± 0.067 cd                 | 0.234 ± 0.012 c                  | 2274.826 ± 27.954 ab             | 3324.491 ± 56.892 ab             | 2514.927 ± 96.223 bc             |
| 9 d  | 5.052 ± 0.362 bc     | 3.268 ± 0.091 ab     | 0.877 ± 0.076 a      | 1.783 ± 0.272 bc                 | 0.139 ± 0.044 cd                 | 1801.994 ± 266.546 bc            | 3626.320 ± 328.930 a             | 2046.511 ± 136.848 cd            |
| 12 d | 5.464 ± 0.442 ab     | 3.359 ± 0.114 a      | 0.763 ± 0.187 a      | 2.106 ± 0.355 b                  | 0.094 ± 0.051 d                  | 1181.409 ± 477.941 c             | 3121.937 ± 465.650 b             | 1503.533 ± 265.565 d             |
| 15 d | 7.769 ± 0.457 a      | 1.612 ± 0.258 d      | 0.398 ± 0.033 b      | 6.157 ± 0.432 a                  | 0.023 ± 0.021 d                  | 272.095 ± 138.730 d              | 3263.410 ± 377.499 ab            | 673.318 ± 308.575 e              |

Value are means ± SD (*n* = 5). Duncan's multiple range test is used for multiple comparisons. Lowercase letters within the same column indicate significant differences at the *P* < 0.05 level.
