# Supplementary material for: Exploration of the Effects of Cadmium Stress on Photosynthesis in Oenanthe javanica (Blume) DC
Source: MDPI journal article supplement (doi:10.3390/toxics12050307), 2024-04-23
Supplement: s1 [file s1]

**Table S1.** Physiological parameters of the Cd<sub>100</sub> group on the 0th, 3rd, 6th, 9th, 12th and 15th days of treatment.

|      | Chl a           | Chl b           | Car             | H <sub>2</sub> O <sub>2</sub> | MDA               | Cd <sup>2+</sup> contents |
|------|-----------------|-----------------|-----------------|-------------------------------|-------------------|---------------------------|
| 0 d  | 0.488 ± 0.004 a | 0.281 ± 0.008 a | 0.027 ± 0.003 c | 2.819 ± 0.207 e               | 53.106 ± 4.616 e  | 1.134 ± 0.493 f           |
| 3 d  | 0.483 ± 0.002 a | 0.234 ± 0.004 b | 0.023 ± 0.001 d | 3.259 ± 0.170 de              | 78.478 ± 3.418 d  | 64.226 ± 5.397 e          |
| 6 d  | 0.418 ± 0.025 b | 0.211 ± 0.007 c | 0.032 ± 0.001 b | 3.340 ± 0.196 d               | 84.201 ± 1.907 c  | 220.896 ± 17.392 d        |
| 9 d  | 0.404 ± 0.012 c | 0.192 ± 0.007 d | 0.021 ± 0.001 d | 4.359 ± 0.205 c               | 89.210 ± 4.688 c  | 396.215 ± 22.162 c        |
| 12 d | 0.361 ± 0.005 d | 0.166 ± 0.002 e | 0.042 ± 0.005 a | 5.509 ± 0.257 b               | 95.396 ± 2.478 b  | 670.635 ± 29.353 b        |
| 15 d | 0.280 ± 0.018 e | 0.113 ± 0.003 f | 0.033 ± 0.003 b | 6.447 ± 0.243 a               | 107.464 ± 4.075 a | 1013.947 ± 33.605 a       |

Value are means ± SD (*n* = 5). Duncan's multiple range test is used for multiple comparisons. Lowercase letters within the same column indicate significant differences at the *P* < 0.05 level.
