# Supplementary material for: Exploration of the Effects of Cadmium Stress on Photosynthesis in Oenanthe javanica (Blume) DC
Source: Toxics. 2024 Apr 23;12(5):307. doi: 10.3390/toxics12050307 (PMC11125355; doi:10.3390/toxics12050307)
Supplement: Supplementary file 1 [file toxics-12-00307-s001.zip]

Archive with 4 entries (4 files):
- Fig. S1.pdf
- Table. S1.pdf
- Table. S2.pdf
- Table. S3.pdf
